# Supplementary material for: A rapid colorimetric paper-based sensor strip for point-of-care monitoring of the blood plasma coagulation
Source: Royal Society of Chemistry journal article supplement (doi:10.1039/d4cc06195k), 2025-01-01
Supplement: d4cc06195k1.pdf [file d4cc06195k1.pdf]

## Supporting information

### A rapid colorimetric paper-based sensor strip for point-of-care monitoring of the blood plasma coagulation

Elmira Rafatmah,<sup>a</sup> Bahram Hemmateenejad<sup>\*a</sup>

<sup>a</sup> Chemistry Department, Shiraz University, Shiraz, Iran.

<sup>b\*</sup>Corresponding author E-mail address: hemmatb@shirazu.ac.ir

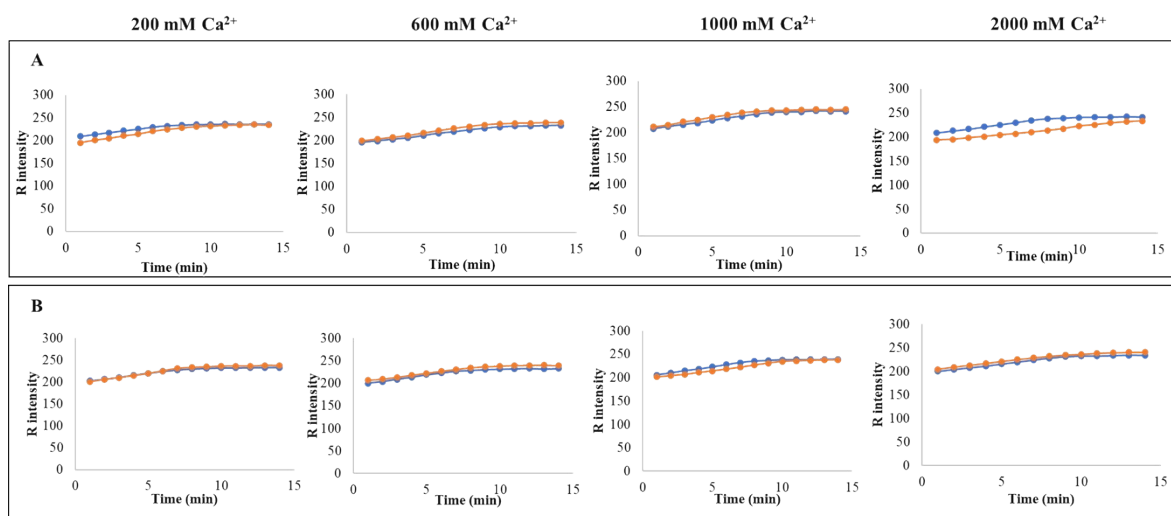

Figure S1. Comparison between the intensity of factor R when using plasma samples of level 1 and 2 on the sensor prepared in different conditions of calcium ion concentration (200-2000 mM) in the absence of thromboplastin (row A) and the presence of thromboplastin (row B)

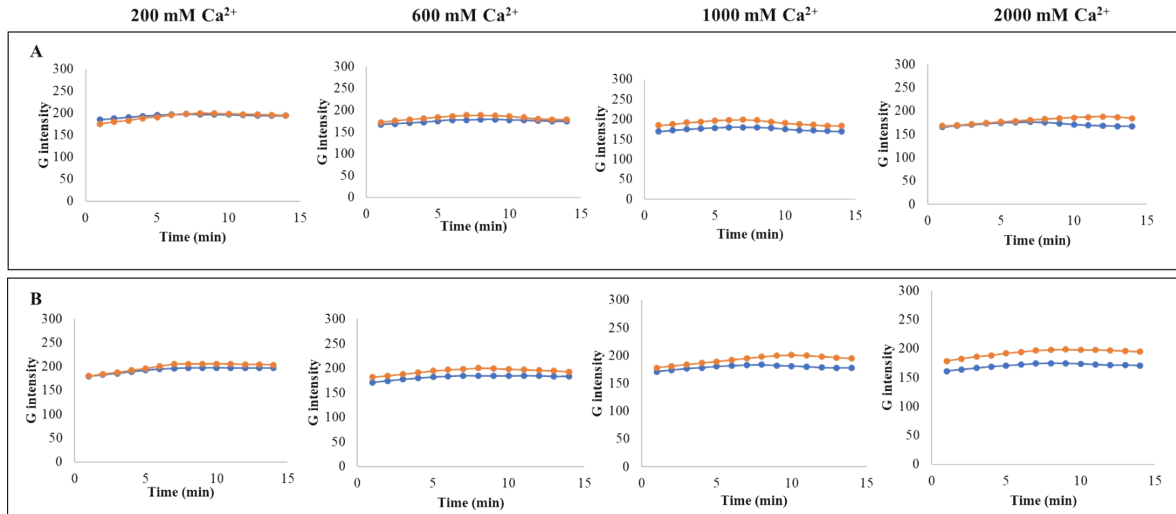

Figure S2. Comparison between the intensity of factor G when using plasma samples of level 1 and 2 on the sensor prepared in different conditions of calcium ion concentration (200-2000 mM) in the absence of thromboplastin (row A) and the presence of thromboplastin (row B).

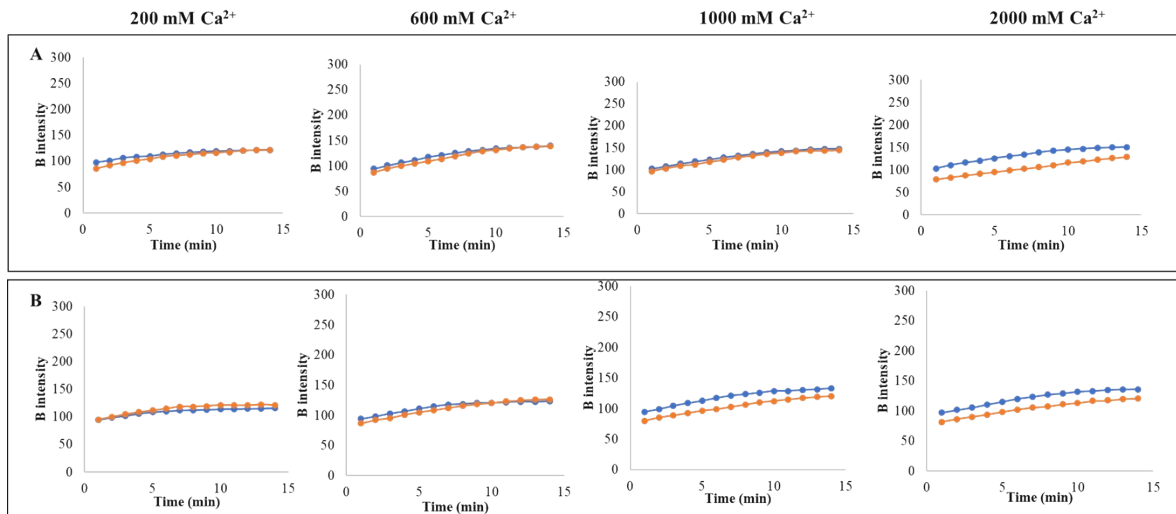

Figure S3. Comparison between the intensity of factor B when using level 1 and 2 plasma samples on the sensor prepared in different conditions of calcium ion concentration (200-2000 mM) in the absence of thromboplastin (row A) and the presence of thromboplastin (row B).

| <b>Table S1. Calibration curve data points</b> |                                                |
|------------------------------------------------|------------------------------------------------|
| <b>INR value plasma sample</b>                 | <b>Average B intensity of three replicates</b> |
| 1.083333                                       | 132.9967                                       |
| 1.09                                           | 131.9933                                       |
| 1.097561                                       | 134.334                                        |
| 1.154472                                       | 134.284                                        |
| 1.197431                                       | 133.5223                                       |
| 1.047619                                       | 142.8983                                       |
| 1.146341                                       | 141.5483                                       |
| 1.710776                                       | 137.1107                                       |
| 1.710776                                       | 137.9667                                       |
| 2.035602                                       | 137.2743                                       |
| 2.533333                                       | 129.3497                                       |
| 2.61                                           | 122.3733                                       |
| 2.699187                                       | 128.4103                                       |
| 2.943089                                       | 132.89                                         |
| 2.958333                                       | 123.668                                        |
| 3.708333                                       | 122.5753                                       |
| 5.2                                            | 115.6637                                       |
